# Supplementary material for: Outer-sphere reductive elimination as the enantio-determining step in Ir III /Ni II metallaphotoredox-catalyzed α-(hetero)aryl amination: a DFT study
Source: Royal Society of Chemistry journal article supplement (doi:10.1039/d5qo01726b), 2026-01-01
Supplement: d5qo01726b2.pdf [file d5qo01726b2.pdf]

## *Electronic Supplementary Information*

# **Outer-Sphere Reductive Elimination as the Enantio- Determining Step in Ir<sup>III</sup>/Ni<sup>II</sup> Metallaphotoredox-Catalyzed $\alpha$ - (Hetero)aryl Amination: A DFT Study**

*Ya-Bin Jiang<sup>1</sup>, Wei Guan<sup>2\*</sup>, and Yu-Jie Liang<sup>1, 2\*</sup>*

<sup>1</sup>Precision Medicine Laboratory for Chronic Non-communicable Diseases of  
Shandong Province, Institute of Precision Medicine, Jining Medical University,  
Jining, Shandong 272067, People's Republic of China

<sup>2</sup> Institute of Functional Material Chemistry, Faculty of Chemistry, Northeast Normal  
University, Changchun 130024, People's Republic of China

## **Table of Contents**

### COMPUTATIONAL DETAILS

|                                                             |     |
|-------------------------------------------------------------|-----|
| .....                                                       | S2  |
| 1. Correction of translational entropy in solution.....     | S2  |
| 2. Redox potential.....                                     | S3  |
| 3. Activation Barrier of Single Electron Transfer Step..... | S4  |
| REFERENCES .....                                            | S13 |

## COMPUTATIONAL DETAILS

### 1. Correction of Translational Entropy in Solution

We evaluated the electronic energy ( $E_{\text{sol}}$ ) with zero-point energy correction in solution. For each species, the  $E_{\text{sol}}$  is defined through equation (S1):

$$E_{\text{sol}} = E_{\text{sol}}^{\text{pot}} + E_{\text{gas}}^{\text{v}_0} \quad (\text{S1})$$

the  $E_{\text{sol}}^{\text{pot}}$  is the potential energy including non-electrostatic energy in solution and  $E_{\text{gas}}^{\text{v}_0}$  delegates the zero-point vibrational energy in the gas phase. In a bimolecular process, such as the Ni(I) complex capture the  $\alpha$ -amino radical, the entropy change which can decrease considerably must be taken into consideration. In such case, Gibbs energy ( $G_{\text{sol}}^o$ ) need be computed as follows:

$$\begin{aligned} G_{\text{sol}}^o &= H_0 - T(S_{\text{r}}^o + S_{\text{v}}^o + S_{\text{t}}^o) \\ &= E^T + P\Delta V - T(S_{\text{r}}^o + S_{\text{v}}^o + S_{\text{t}}^o) \\ &= E_{\text{sol}} + E_{\text{therm}} - T(S_{\text{r}}^o + S_{\text{v}}^o + S_{\text{t}}^o) \end{aligned} \quad (\text{S2})$$

where  $\Delta V$  is 0 in solution,  $E_{\text{therm}}$  is the thermal correction by translational, vibrational, and rotational movements, and  $S_{\text{r}}^o$ ,  $S_{\text{v}}^o$ , and  $S_{\text{t}}^o$  are rotational, vibrational, and translational entropies, respectively. In general, the Sackur-Tetrode equation is used to evaluate translational entropy  $S_{\text{t}}^o$ . In solution, however, the usual Sackur-Tetrode equation cannot be directly applied to the evaluation of  $S_{\text{t}}^o$ , because the translation movement is suppressed very much in solution.<sup>S1</sup> In this context, the translational entropy was corrected with the method developed by Whitesides et al., where the rotational entropy was evaluated in a normal manner. Thermal correction and entropy contributions of vibration movements to the Gibbs energy were evaluated with the frequencies calculated at 298.15 K and 1 atm.

## 2. Redox potential

We calculated the standard redox potential ( $E_{1/2}^{red}$ ) according to the equation (S3):<sup>S2</sup>

$$E_{1/2}^{red} = -\frac{\Delta G_r}{nF} - E_{SCE} \quad (S3)$$

where,  $F$  is the Faraday constant and  $n$  is the number of electrons transferred,  $E_{SCE}$  = 4.51V, and  $\Delta G_r$  is the free energy change of the reaction.

**Table S1** The calculated redox potential of Ir complexes.

| Redox Potential                                                  | Cal. i-PrOAc |
|------------------------------------------------------------------|--------------|
| $E_{1/2}^{red} [\text{Ir}^{\text{IV}}/*\text{Ir}^{\text{III}}]$  | −1.48 V      |
| $E_{1/2}^{red} [\text{Ir}^{\text{IV}}/\text{Ir}^{\text{III}}]$   | 1.26 V       |
| $E_{1/2}^{red} [* \text{Ir}^{\text{III}}/\text{Ir}^{\text{II}}]$ | 1.13 V       |
| $E_{1/2}^{red} [\text{Ir}^{\text{III}}/\text{Ir}^{\text{II}}]$   | −1.81 V      |

**Table S2** The calculated redox potential of Ni complexes.

| Redox Potential                                              | Cal. i-PrOAc |
|--------------------------------------------------------------|--------------|
| $E_{1/2}^{red} [\text{Ni}^{\text{II}}/\text{Ni}^{\text{I}}]$ | 0.13 V       |

**Table S3** The calculated redox potential of S1 complexes.

| Redox Potential                         | Cal. i-PrOAc |
|-----------------------------------------|--------------|
| $E_{1/2}^{red} [\text{S1}^+/\text{S1}]$ | −1.58 V      |

**Scheme S1.** Single electron transfer processes.  $\Delta G^{\circ\ddagger}$  values of SET processes are given in kcal/mol.

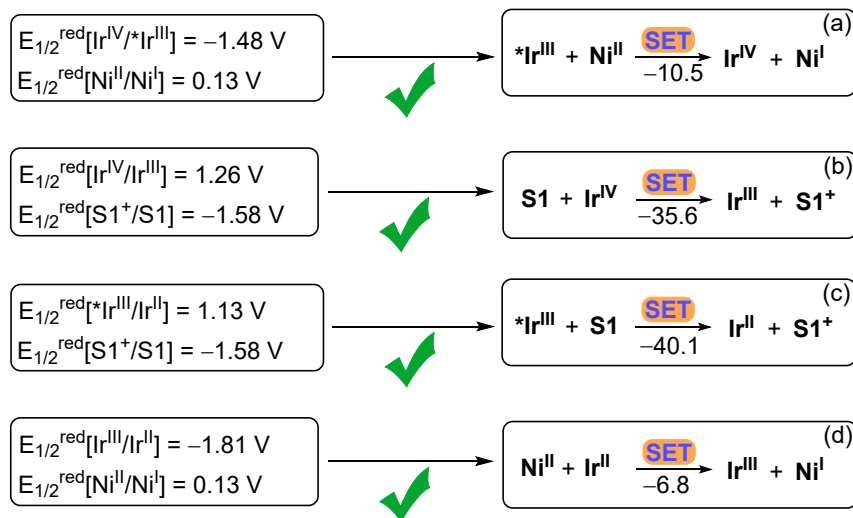

### 3. Activation barrier of single electron transfer step

According to the Marcus equation, the reorganization energy  $\lambda$  is normally decomposed into internal energy ( $\lambda_i$ ) and external energy ( $\lambda_o$ ). The internal reorganization energy  $\lambda_i$  can be estimated according to the equation:

$$\lambda_{i1} = [E^D(Q_R) + E^A(Q_R)] - [E^D(Q_P) + E^A(Q_P)] \quad (\text{S4})$$

$$\lambda_{i2} = [E^{D^+}(Q_R) + E^{A^-}(Q_R)] - [E^{D^+}(Q_P) + E^{A^-}(Q_P)] \quad (\text{S5})$$

$$\lambda_i = (\lambda_{i1} + \lambda_{i2})/2 \quad (\text{S6})$$

where  $Q_R$  and  $Q_P$  are the equilibrium geometries of the reactants and products, respectively. In addition, the external reorganization energy  $\lambda_o$  may be calculated from equation (S7–S9)

$$\lambda_o = (332 \text{ kcal/mol}) \left( \frac{1}{2a_1} + \frac{1}{2a_2} - \frac{1}{R} \right) \left( \frac{1}{\epsilon_{op}} - \frac{1}{\epsilon} \right) \quad (\text{S7})$$

$$\lambda = \lambda_o + \lambda_i \quad (\text{S8})$$

$$\Delta G^{\circ\ddagger} = \frac{(\Delta G_r + \lambda)^2}{4\lambda} \quad (\text{S9})$$

where  $a_1$  is the radii of the oxidant,  $a_2$  is the radii of the reductant,  $R = a_1 + a_2$ ,  $\epsilon_{op}$  is

the optical dielectric constant ( $\epsilon_{op} = 2.25$ ),  $\epsilon$  is the static dielectric constant for the isopropyl acetate solvent ( $\epsilon = 4.9$ ), and  $\Delta G_r$  is the free energy change of the reaction.

**Table S4** Estimation of the activation barriers for SET step.

| SET step | $a_1$<br>(Å) | $a_2$<br>(Å) | <b>R</b><br>(Å) | $\lambda$<br>(kcal/mol) | $\Delta G_r$<br>(kcal/mol) | $\Delta G_{SET}$<br>(kcal/mol) |
|----------|--------------|--------------|-----------------|-------------------------|----------------------------|--------------------------------|
| (a)      | 4.50         | 4.73         | 9.23            | 23.0                    | −10.5                      | 1.7                            |
| (b)      | 3.46         | 4.59         | 8.05            | 32.4                    | −35.6                      | 0.3                            |
| (c)      | 3.46         | 4.50         | 7.96            | 51.7                    | −40.1                      | 0.7                            |
| (d)      | 4.73         | 4.31         | 9.04            | 23.9                    | −6.8                       | 3.1                            |

**Table S5** The NBO population of key compounds.

| species                        | Ir(III) | *Ir(III) | Ir(IV) | Ni(II)<br><b>T<sub>6</sub></b> | Ni(I)<br><b>D<sub>1</sub></b> | Ni(II)<br><b>T<sub>4R</sub></b> | Ni(III)<br><b>D<sub>3</sub></b> | Ni(II)<br><b>T<sub>5R</sub></b> |
|--------------------------------|---------|----------|--------|--------------------------------|-------------------------------|---------------------------------|---------------------------------|---------------------------------|
| Natural Charge of metal center | 0.26    | 0.32     | 0.40   | 0.76                           | 0.45                          | 0.76                            | 0.91                            | 0.72                            |
| d-orbital population           | 7.83    | 7.75     | 7.66   | 8.33                           | 8.87                          | 8.39                            | 7.50                            | 8.34                            |

**Scheme S2.** The sketch map of optical physical processes of **Ir<sup>III</sup>**.

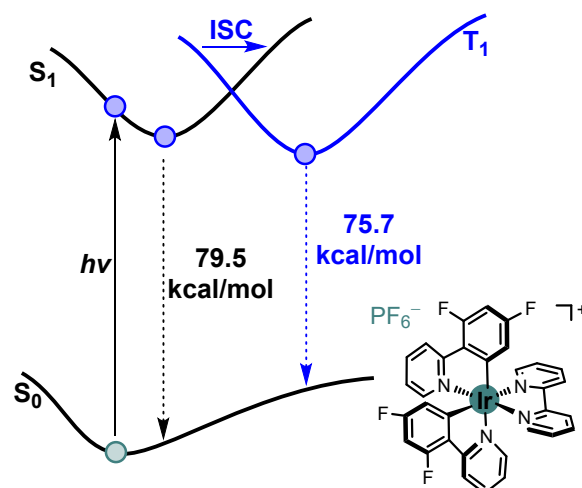

**Scheme S3.** The Gibbs free energy change ( $\Delta G^\circ_{298.15}$  in kcal/mol) of the reductive quenching process of  $^*\text{Ir}^{\text{III}}(\text{Cl})$  with  $^{\text{T}}\text{Ni}^{\text{II}}$  to afford  $\text{Ir}^{\text{II}}$  and  $^{\text{D}}\text{Ni}^{\text{III}}$  species steps for generating  $\alpha$ -carbon centered radical.

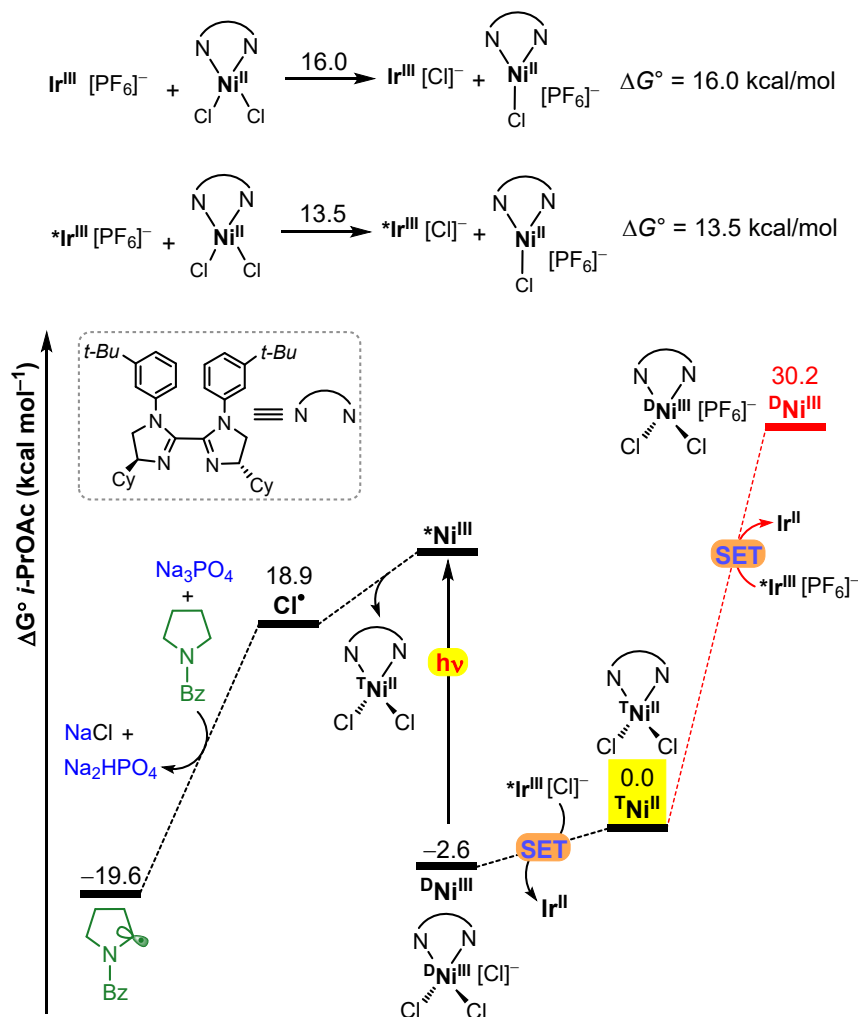

**Scheme S4.** Ir<sup>III</sup>/Ni<sup>II</sup> metallaphotoredox dual catalytic cycles: (A) (a1) oxidative quenching cycle of photocatalyst \*Ir<sup>III</sup> [PF<sub>6</sub>]<sup>-</sup>, (a2) reductive quenching cycle of photocatalyst \*Ir<sup>III</sup> [PF<sub>6</sub>]<sup>-</sup>, and (b) possible nickel catalytic cycles. (B) possible mechanism of photocatalyst \*Ir<sup>III</sup> [Cl]<sup>-</sup> participation.

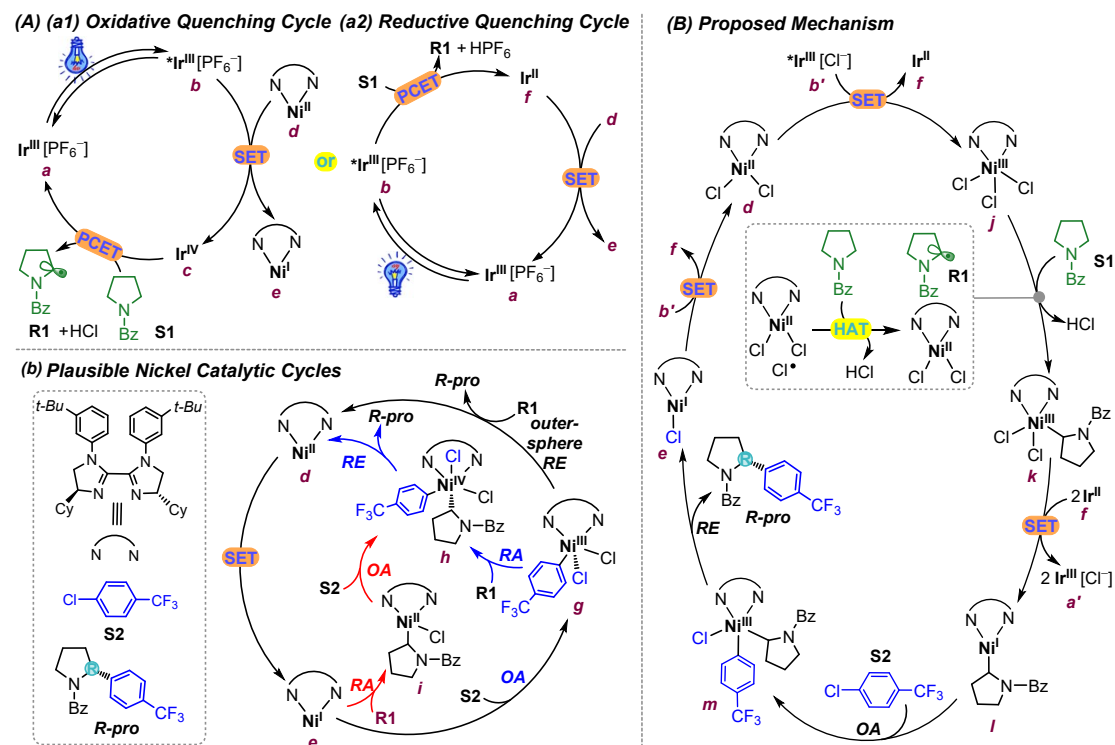

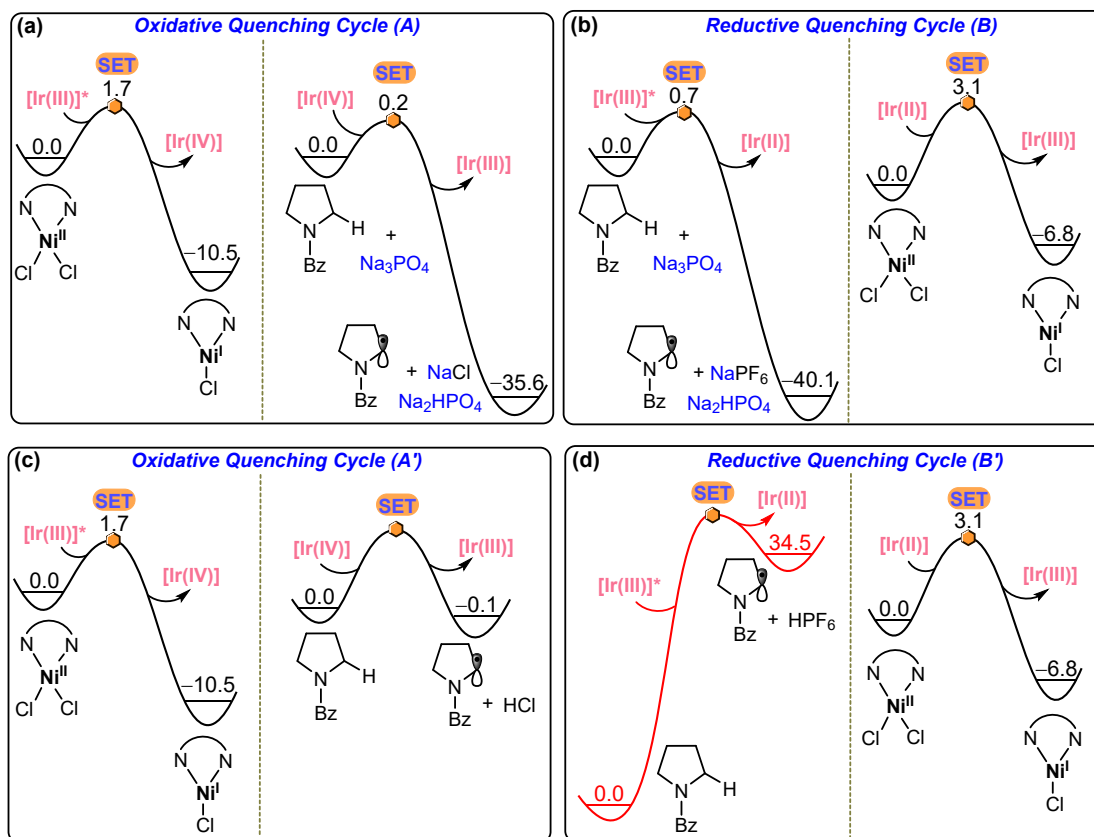

**Fig. S1.** Energy profiles ( $\Delta G^\circ_{298.15}$ ) of SET processes involved in the oxidative quenching and reductive quenching cycles in the presence (a and b) and absence of  $\text{Na}_3\text{PO}_4$  (c and d).



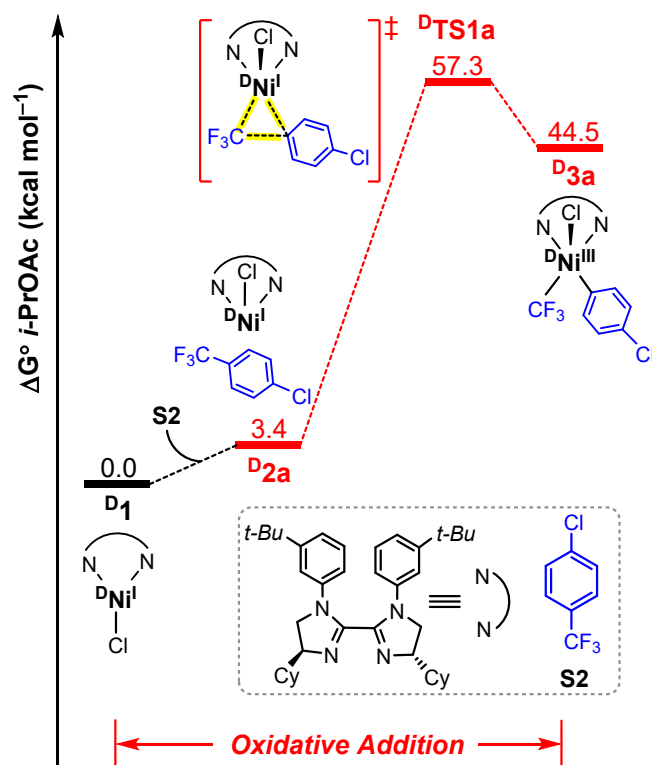

**Fig. S2.** Gibbs energy profile ( $\Delta G^\circ_{298.15}$ ) of C–CF<sub>3</sub> oxidative addition of **S2** to nickel(I) center in **D1**.

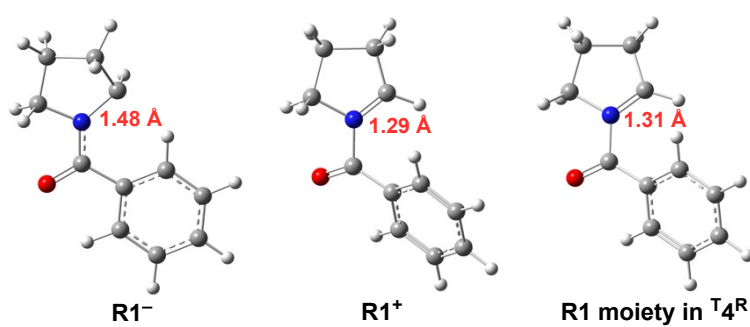

**Fig. S3.** Comparison of optimized geometries of anionic **R1<sup>−</sup>** and cationic **R1<sup>+</sup>** with **R1** moiety in **T4<sup>R</sup>**.

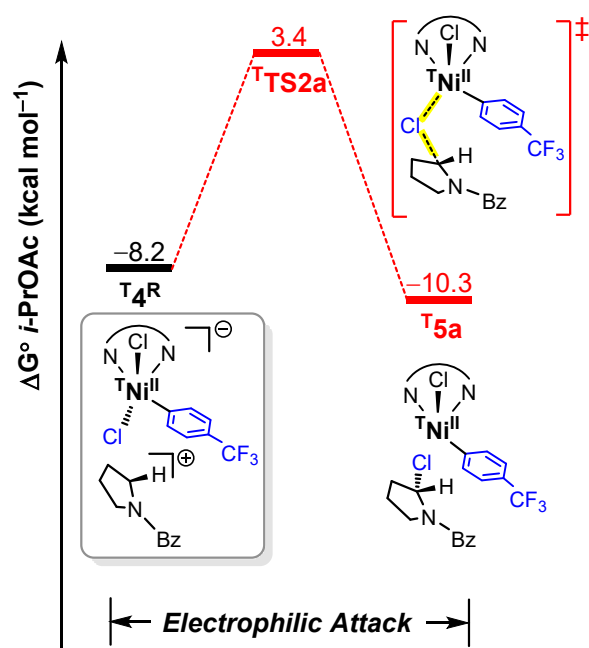

**Fig. S4.** Gibbs energy profile ( $\Delta G^\circ_{298.15}$ ) of the electrophilic attack to forge C-Cl bond.

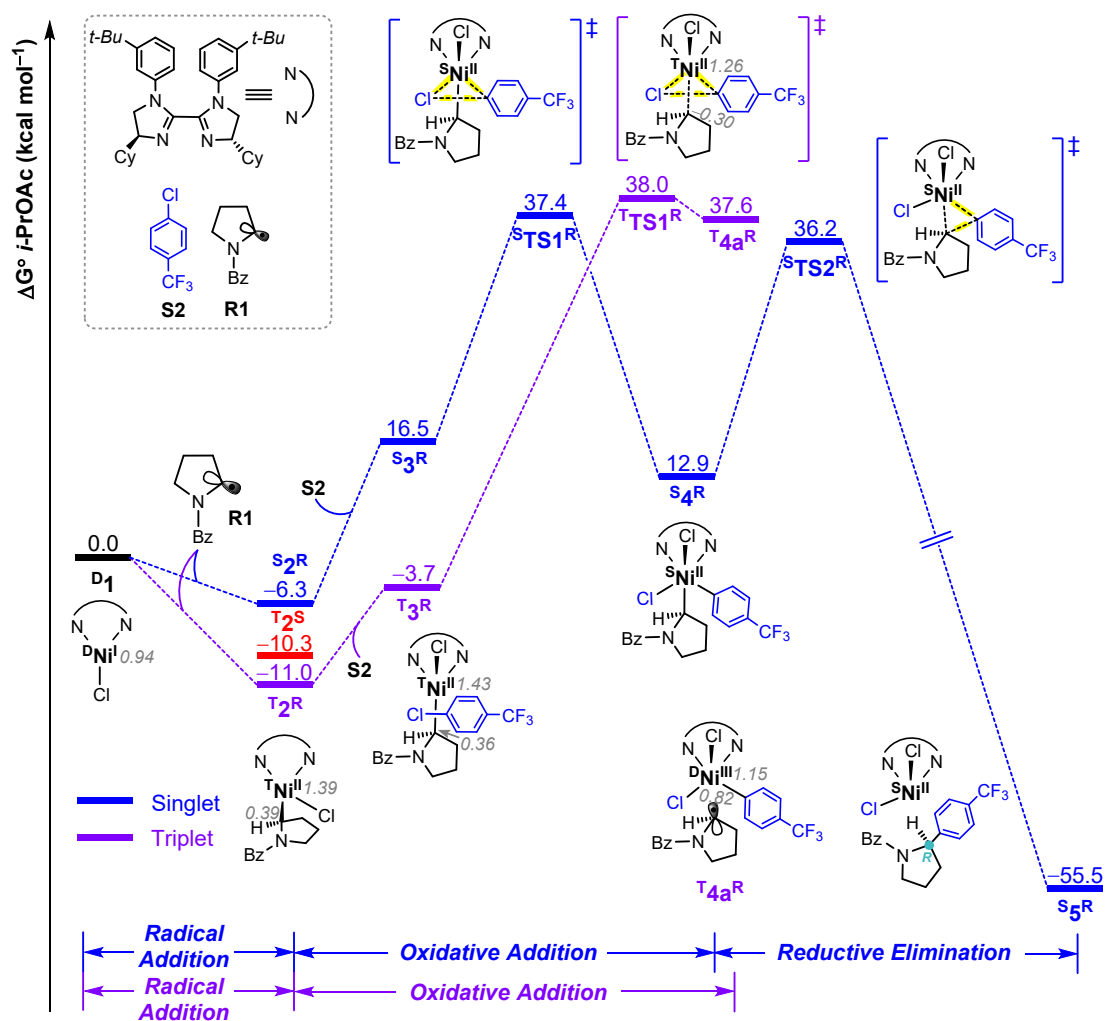

**Fig. S5.** Energy profiles ( $\Delta G^\circ_{298.15}$ ) of various competitive nickel catalytic pathways.





## REFERENCES

- S1. (a) Sakaki, S.; Ohnishi, Y. Y.; Sato, H., Theoretical and Computational Studies of Organometallic Reactions: Successful or Not? *Chem. Rec.* **2010**, *10*, 29–45; (b) Ishikawa, A., Nakao, Y., Sato, H.; Sakaki, S., Oxygen Atom Transfer Reactions of Iridium and Osmium Complexes: Theoretical Study of Characteristic Features and Significantly Large Differences between These Two Complexes. *Inorg. Chem.* **2009**, *48*, 8154–8163; (c) Ishikawa, A., Nakao, Y., Sato, H.; Sakaki, S., Pd(II)-Promoted Direct Cross-Coupling Reaction of Arenes via Highly Regioselective Aromatic C–H Activation: A Theoretical Study. *Dalton Trans.* **2010**, 39, 3279–3289.
- S2. Marenich, A. V., Ho, J., Coote, M. L., Cramer, C. J.; Truhlar, D. G., Computational Electrochemistry: Prediction of Liquid-phase Reduction Potentials. *Phys. Chem. Chem. Phys.* **2014**, *16*, 15068–15106.
- S3. (a) Baba, H., Suzuki, S.; Takemura, T., Configuration Analysis in the LCAO Molecular Orbital Theory. *J. Chem. Phys.* **1969**, *50*, 2078–2086. (b) Kato, S., Yamabe, S.; Fukui, K., Molecular Orbital Calculations of the Electronic Structure of Borazane. *J. Chem. Phys.* **1974**, *60*, 572–578. (c) Dapprich, S.; Frenking, G., Rotational Analysis of n=4–7 Rydberg States of CO Observed by Ion-Dip Spectroscopy. *J. Phys. Chem.* **1995**, *99*, 9352–9362.
